# Supplementary material
Source: publisher site journal article supplement (https://oneecosystem.pensoft.net/article/download/suppl/7674646/)
Supplement: Supplementary file 1

**Appendix 5. Summary of the condition assessment of forests in MAES-HU (indicators, scores and threshold values)**

**5.1 Indicators and scores (forests)**

| Compositional Indicators                                                                                 |                                |                                                                                  |                         |
|----------------------------------------------------------------------------------------------------------|--------------------------------|----------------------------------------------------------------------------------|-------------------------|
| Native forests                                                                                           |                                | Non-native plantations                                                           |                         |
| Indicator                                                                                                | Threshold values/Scores        | Indicator                                                                        | Threshold values/Scores |
| Number of native admixing tree species                                                                   | 0: 1                           | -                                                                                |                         |
|                                                                                                          | 1-2: 2                         |                                                                                  |                         |
|                                                                                                          | >2: 3                          |                                                                                  |                         |
| Presence of the main tree species characteristic of the specific habitat type in the expected proportion | <i>if yes: 1 otherwise 0</i>   |                                                                                  |                         |
| The proportion of the native mixing tree species compared to that expected in the specific habitat type  | 0-30: 1                        | Number of native tree species                                                    | 0-3: 1                  |
|                                                                                                          | 31-60: 2                       |                                                                                  | 4-6: 2                  |
|                                                                                                          | >60: 3                         |                                                                                  | >6: 3                   |
| The proportion of non-native tree species in the upper and lower canopy layers (%)                       | 21-50: 1                       | The proportion of native tree species in the upper and lower canopy layers (%)   | 0-50: 1                 |
|                                                                                                          | 1-20: 2                        |                                                                                  | 51-75: 2                |
|                                                                                                          | 0: 3                           |                                                                                  | >75: 3                  |
| The proportion of invasive tree species in the upper and lower canopy layers (%)                         | >15: 1                         | The proportion of invasive tree species in the upper and lower canopy layers (%) | >15: 1                  |
|                                                                                                          | 1-15: 2                        |                                                                                  | 1-15: 2                 |
|                                                                                                          | 0:03                           |                                                                                  | 0: 3                    |
| Structural indicators (native forests and non-native plantations)                                        |                                |                                                                                  |                         |
| Indicator                                                                                                |                                | Threshold values/Scores                                                          |                         |
| Number of age cohorts                                                                                    | 1: 1                           |                                                                                  |                         |
|                                                                                                          | 2: 2                           |                                                                                  |                         |
|                                                                                                          | >2: 3                          |                                                                                  |                         |
| Difference between the lowest and highest cohort age (years)                                             | <30: 0                         |                                                                                  |                         |
|                                                                                                          | >=30: 1                        |                                                                                  |                         |
| Presence of old (>=100 years or 60 in the case of native softwood forests) trees                         | at least one cohort present: 1 |                                                                                  |                         |
|                                                                                                          | otherwise: 0                   |                                                                                  |                         |
| Number of (10-cm) dbh-classes                                                                            | 1: 1                           |                                                                                  |                         |
|                                                                                                          | 2: 2                           |                                                                                  |                         |
|                                                                                                          | >2: 3                          |                                                                                  |                         |
| (Shannon) diversity of (10-cm) dbh-classes – considered only if number of (10-cm) dbh classes >2         | 0-0,69: 0                      |                                                                                  |                         |
|                                                                                                          | >=0,7: 1                       |                                                                                  |                         |
| Presence of large (dbh>50) trees                                                                         | at least one present: 1        |                                                                                  |                         |
|                                                                                                          | otherwise: 0                   |                                                                                  |                         |
| Presence and type of the shrub layer                                                                     | see Table 5.3                  |                                                                                  |                         |

**5.2 Thresholds for the simplified scores (forests)**

| Summed score | Simplified score    |
|--------------|---------------------|
| 1-13         | 1 (least favorable) |
| 14-17        | 2                   |
| 18-21        | 3                   |
| 22-25        | 4                   |
| 26-          | 5 (most favorable)  |

*5.3 Shrub layer scoring (Group 1: beech and hornbeam-dominated forests Group2: oak-hornbeam forests and forests dominated by Acer and Fraxinus species Group3: forest types with more light)*

| <b>Shrub layer presence and cover</b>      | <b>Group 1</b> | <b>Group 2.</b> | <b>Group 3.</b> |
|--------------------------------------------|----------------|-----------------|-----------------|
| No shrub layer                             | 1              | 1               | 1               |
| Uniform, sparse cover, maximum 30%         | 2              | 2               | 1               |
| Sparse cover with groups of shrubs, ma     | 3              | 3               | 2               |
| Uniform, medium cover, 30-70%              | 1              | 2               | 2               |
| Medium cover with groups of shrubs, 30-70% | 2              | 3               | 3               |
| Full cover > 70%                           | 1              | 2               | 3               |
